# Supplementary material
Source: Springer Nature journal article supplement (https://www.springermedizin.de/resource/supplementary/13256_2007_135_MOESM1_ESM.pdf/9645346)

(a)

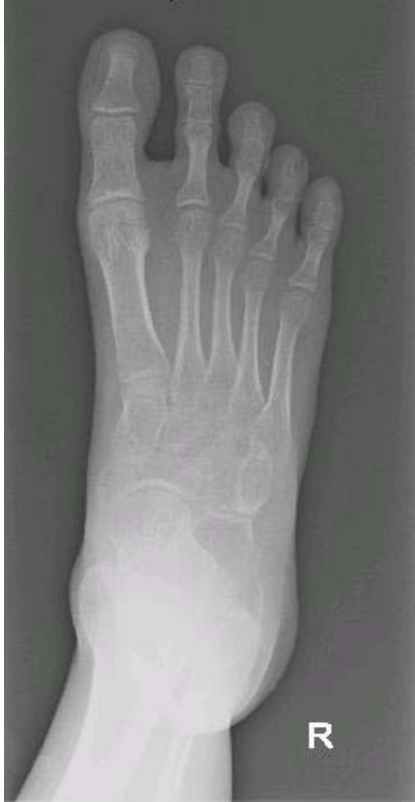

(b)

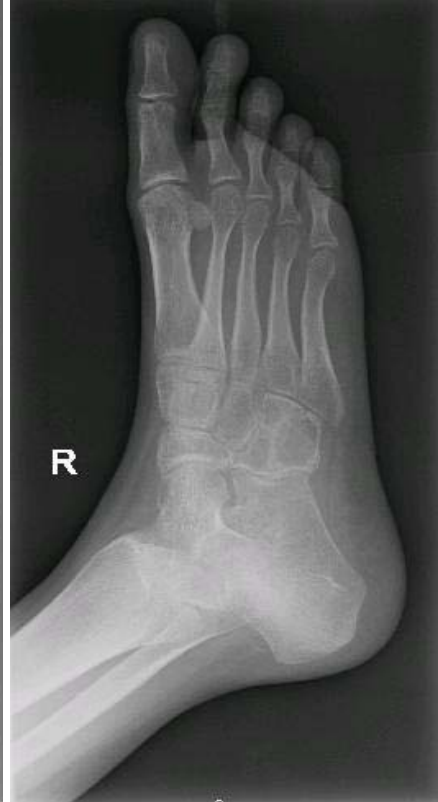

(c)

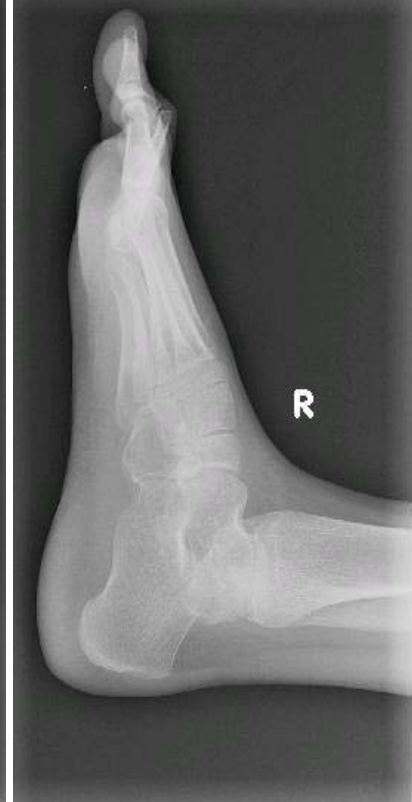

(d)

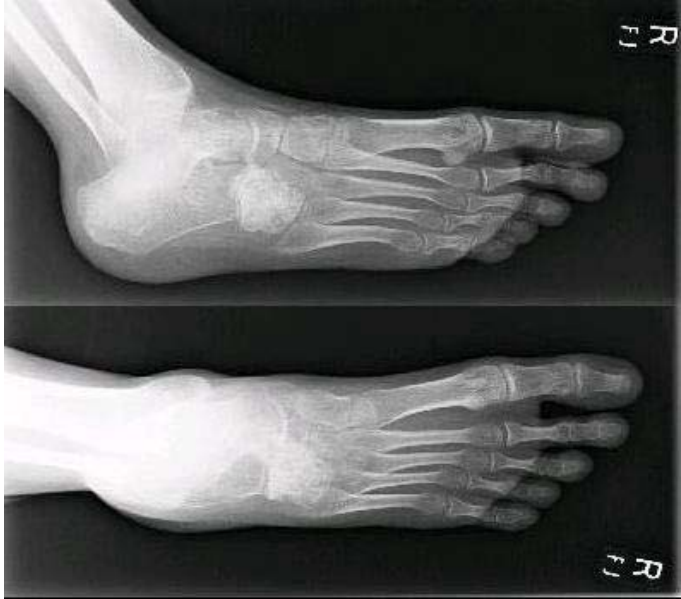

(e)

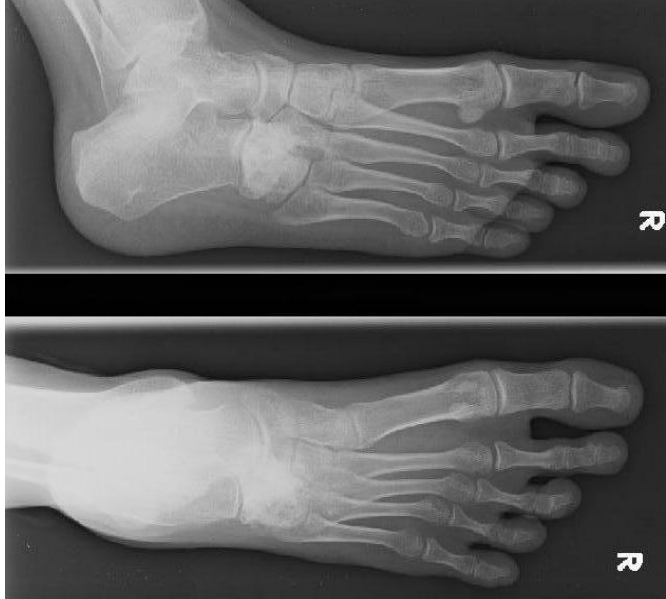

Supplement: MOESM1 [file 9645346]
